# Supplementary material for: Paravascular microcirculation facilitates rapid lipid transport and astrocyte signaling in the brain
Source: PubMed Central journal article supplement — Sci Rep. 2013 Sep 4;3:2582. doi: 10.1038/srep02582 (PMC3761080; doi:10.1038/srep02582), 2013-09-04
Supplement: srep02582-s1.pdf [file srep02582-s1.pdf]

## Paravascular microcirculation facilitates rapid lipid transport and astrocyte signaling in the brain

Vinita Rangroo Thrane, Alexander S. Thrane, Benjamin A. Plog, Meenakshisundaram Thiagarajan, Jeffrey J. Iliff, Rashid Deane, Erlend A. Nagelhus, Maiken Nedergaard

### Supplementary Figure 1

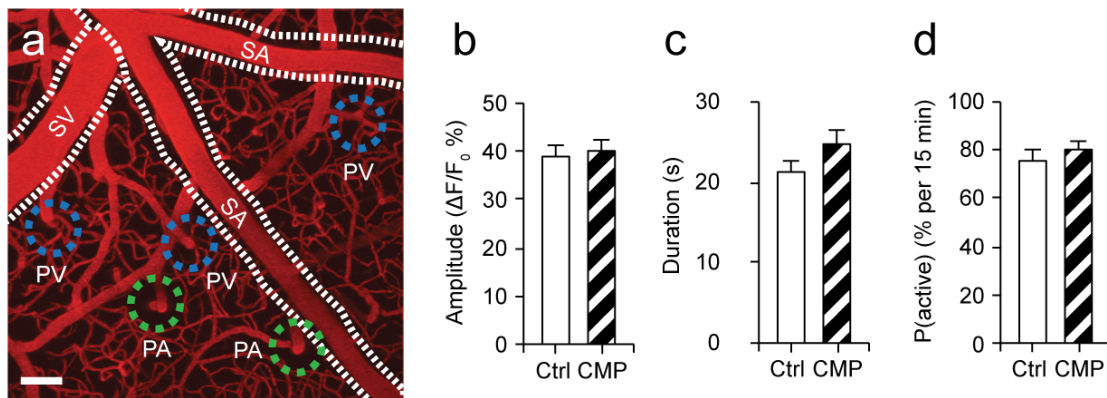

**(a)** *In vivo* two-photon image of the cortical vascular tree outlined using Texas red dextran. Collapsed z-stack from 0 - 200  $\mu\text{m}$ , surface arteries (SA), surface veins (SV), penetrating arterioles (PA), penetrating venules (PV). Scale bar represents 100  $\mu\text{m}$ . **(b-d)** Cisterna magna puncture (CMP) causes no alteration in amplitude ( $n = 54$  ctrl and 49 CMP cells from 6 and 5 animals, respectively), duration ( $n = 55$  ctrl and 49 CMP cells from 6 and 5 animals, respectively) and percent of active cells ( $n = 60$  ctrl and 52 CMP cells from 6 and 5 animals, respectively) in astrocyte calcium signaling. Unpaired  $t$  test. Data are shown as mean  $\pm$  SEM.
